# Supplementary material for: Multiscale Mechanical Characterization of Polyether-2-ketone (PEKK) for Biomedical Application
Source: MDPI journal article supplement (doi:10.3390/bioengineering11030244), 2024-02-29
Supplement: s1 [file s1]

## Supplementary Material

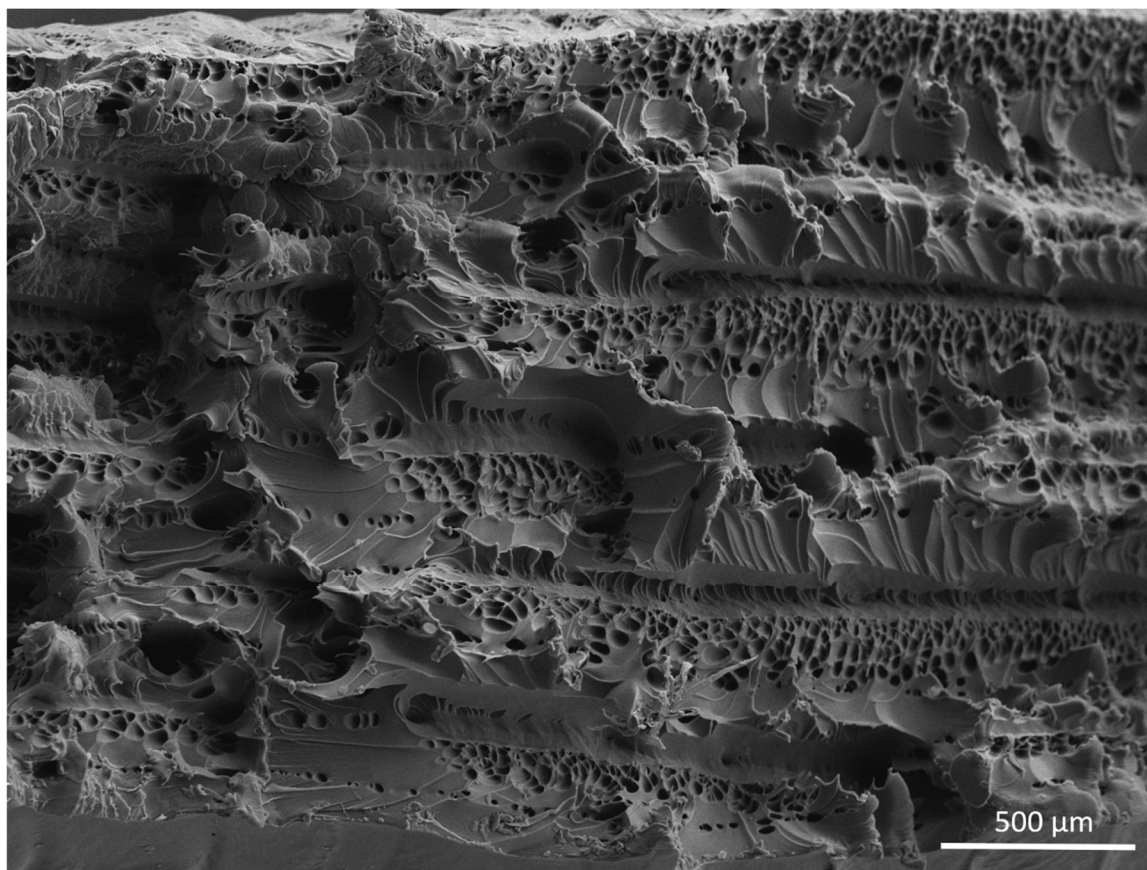

Figure S1. Explanatory SEM image of fractured surface from specimen tested at 0.5 mm/min.

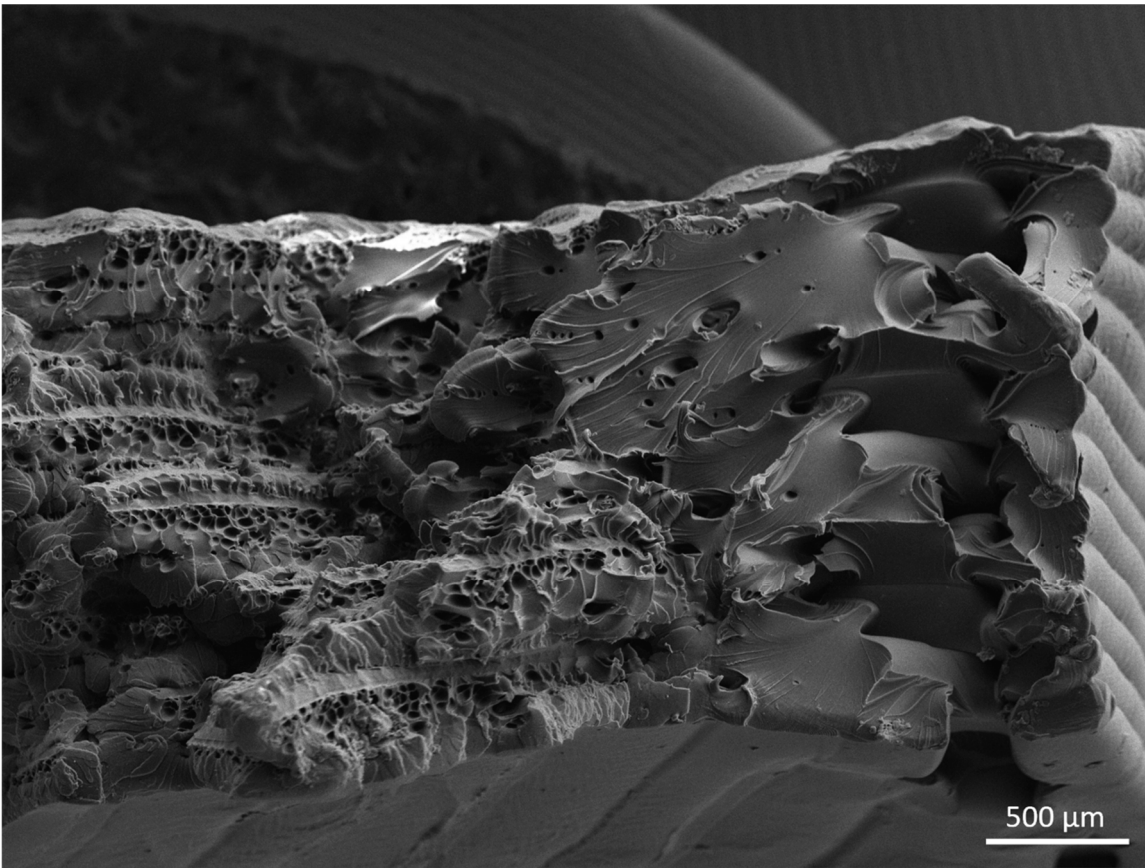

Figure S2. Explanatory SEM image of fractured surface from specimen tested at 0.5 mm/min.

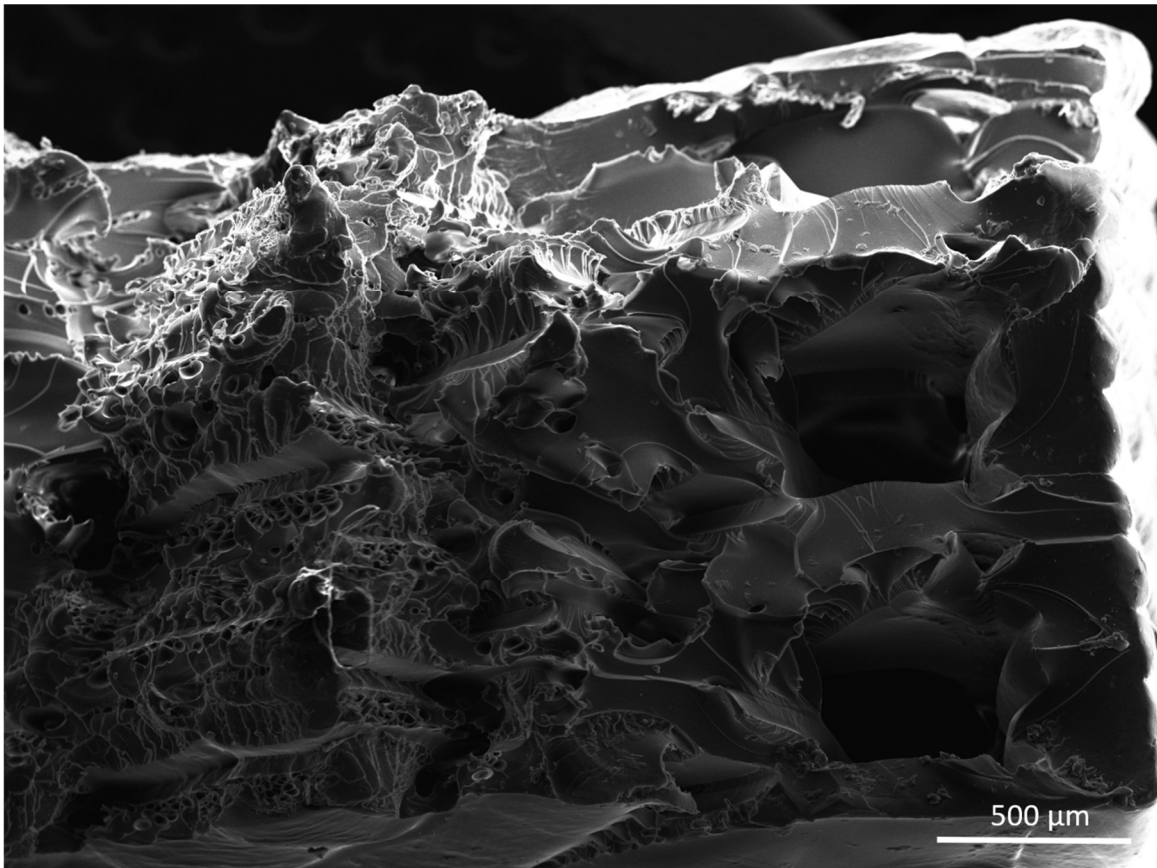

Figure S3. Explanatory SEM image of fractured surface from specimen tested at 10 mm/min.

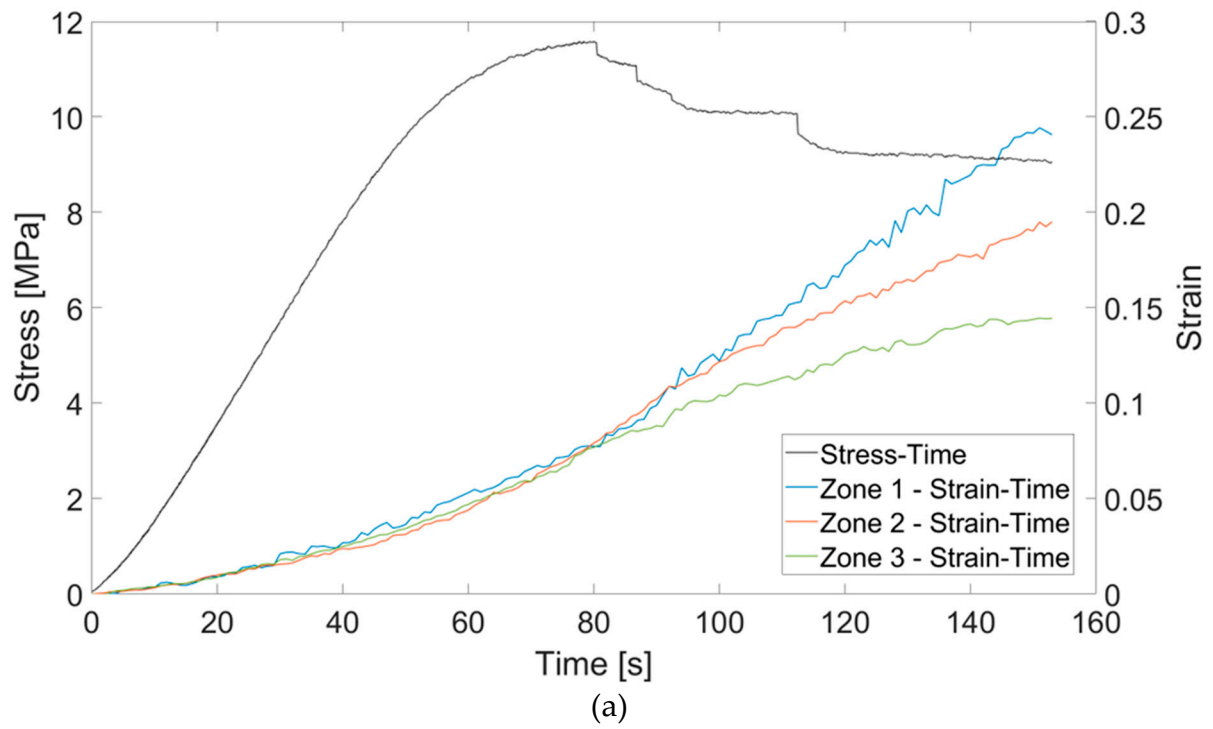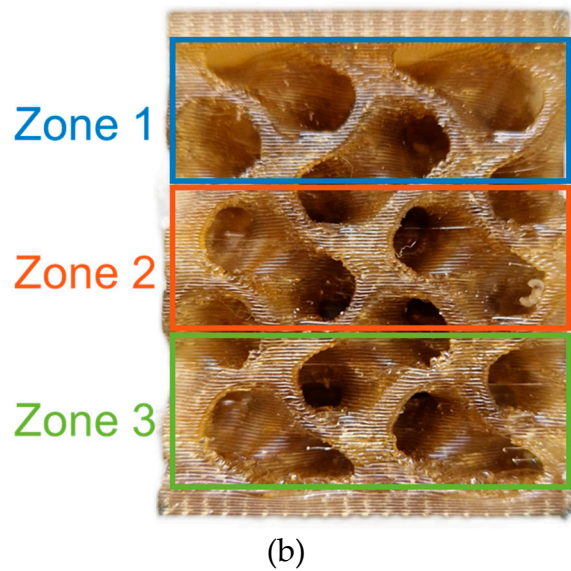

Figure S4. (a) Global Stress-Time curve of the compressive specimen; Local Strain-time curves of the compressive specimen referred to: (b) zone 1, zone 2 and zone 3
